# Supplementary material for: Genome-wide gene expression profiling of stress response in a spinal cord clip compression injury model
Source: PubMed Central journal article supplement (PMC3846681; doi:10.1186/1471-2164-14-583), 2013-08-28

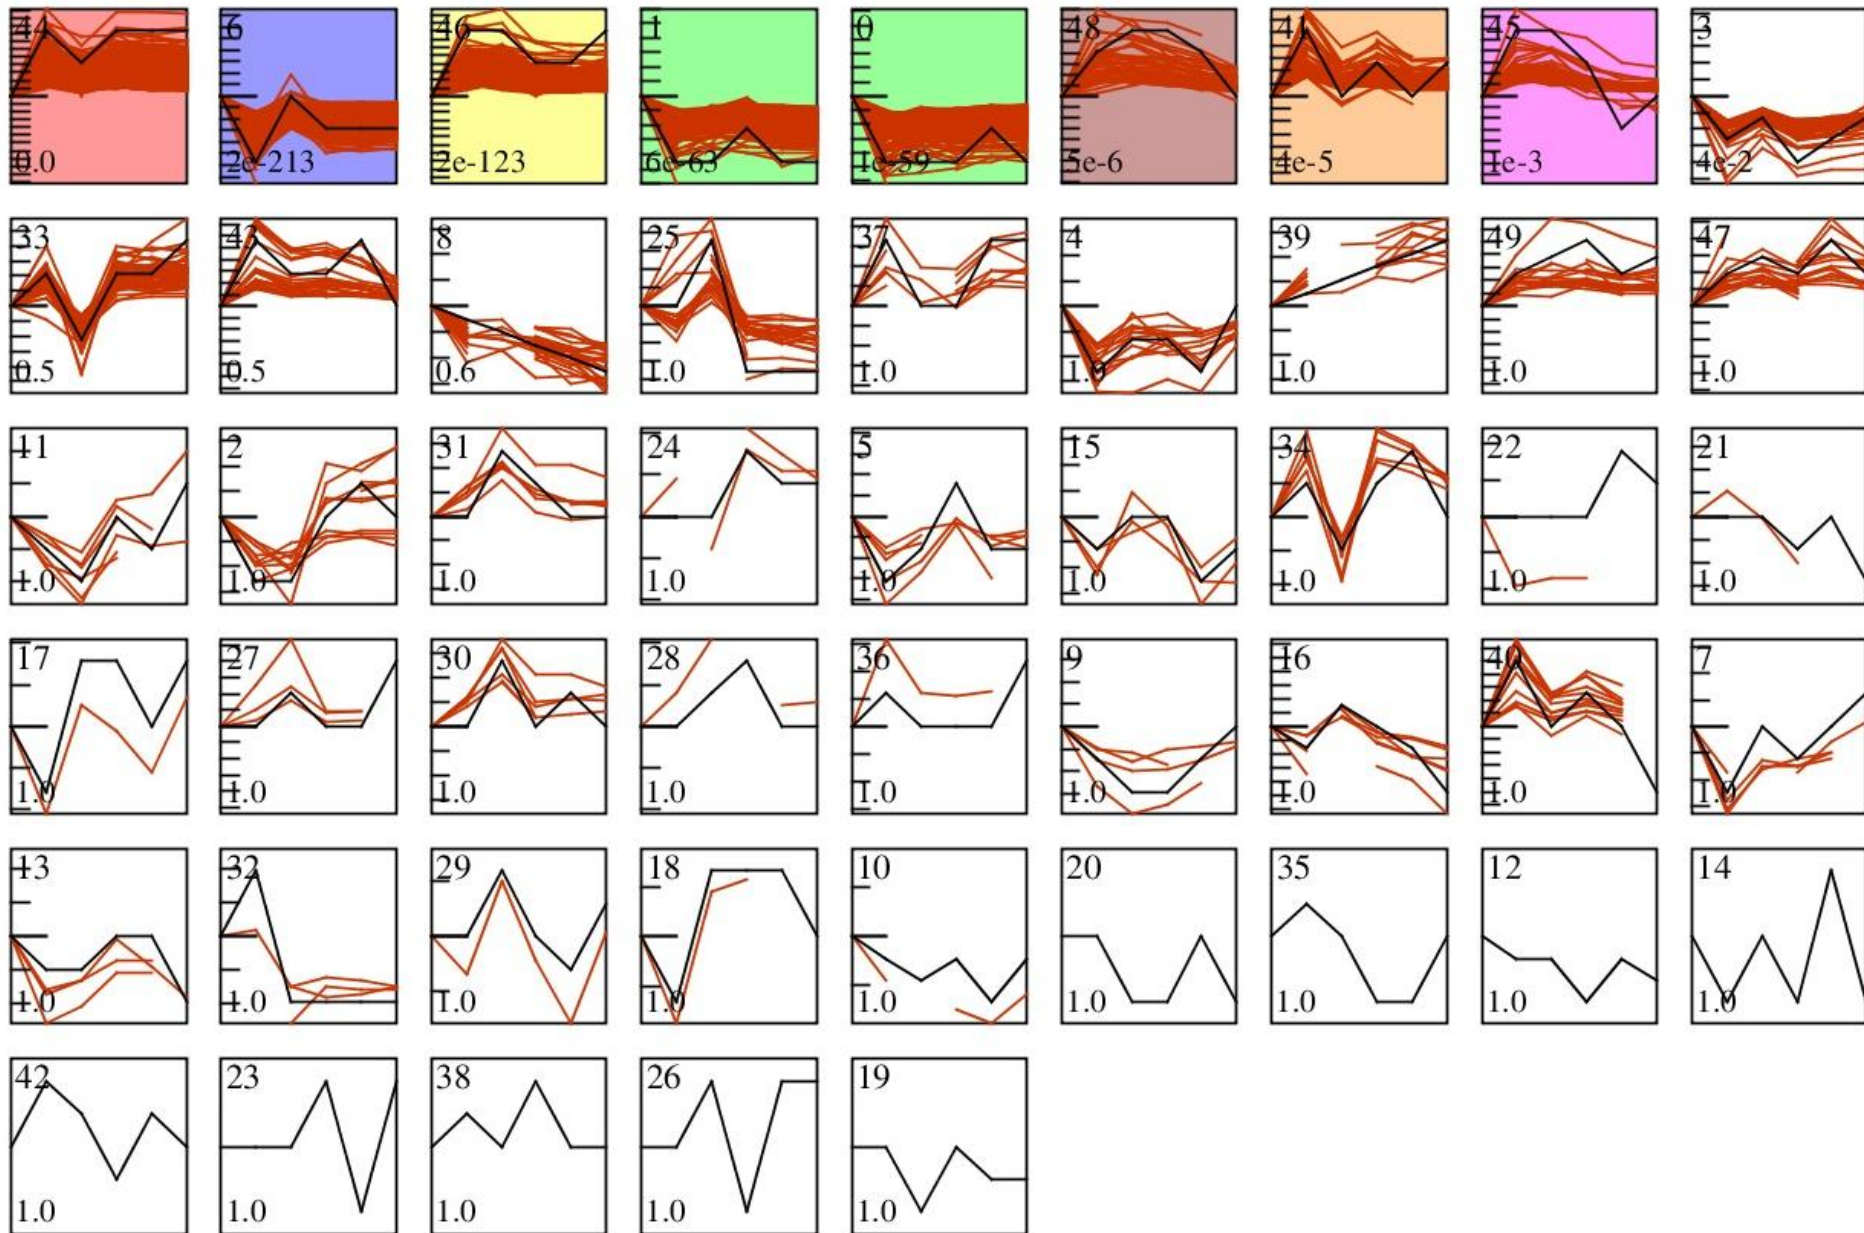

Supplement: 1471-2164-14-583-S1.pdf [file 1471-2164-14-583-S1.pdf]
